# Supplementary material for: Realtors’ Perceptions of Social and Physical Neighborhood Characteristics Associated with Active Living: A Canadian Perspective
Source: MDPI journal article supplement (doi:10.3390/ijerph17239150), 2020-12-07
Supplement: s1 [file s1]

# **Realtors' Perceptions of Social and Physical Neighborhood Characteristics Associated with Active Living. A Canadian Perspective.**

## **QUESTIONS FOR SEMI-STRUCTURED TELEPHONE INTERVIEWS**

- 1. Describe what you think the term “walkability” means in relation to neighbourhood design?**
  - a. Where have you seen or read “walkability” or “walkable” in housing related promotional or marketing material (e.g., real estate magazines, housing sections of newspapers, television, signs and billboards)?
  - b. Tell me about a time when you, or someone else in a professional setting, has mentioned the term “walkability” in conversation? Who was the conversation with and what was the nature of that conversation?
  - c. If you had to describe features or attributes associated with a walkable neighbourhood to a colleague or client, what would you say?
  - d. If you had to describe features or attributes associated with a low walkable neighbourhood to a colleague or client, what would you say?
  - e. What might be some advantages or disadvantages of living in a walkable neighbourhood?
  
- 2. Describe what you think the term “healthy” means in relation to neighbourhood design?**
  - a. Where have you seen or read “healthy” in housing related promotional or marketing material (e.g., real estate magazines, housing sections of newspapers, television, signs and billboards)?
  - b. Tell me about a time when you, or someone else in a professional setting, has mentioned the term “healthy” in conversation? Who was the conversation with and what was the nature of that conversation?
  - c. If you had to describe features or attributes associated with a healthy neighbourhood to a colleague or client, what would you say?
  - d. If you had to describe features or attributes associated with an unhealthy neighbourhood to a colleague or client, what would you say?
  - e. What might be some advantages or disadvantages of living in a healthy neighbourhood?
  
- 3. Describe what you think the term “cycle or bike-ability” means in relation to neighbourhood design?**
  - a. Where have you seen or read “cycle or bike-ability” in housing related promotional or marketing material (e.g., real estate magazines, housing sections of newspapers, television, signs and billboards)?
  - b. Tell me about a time when you, or someone else in a professional setting, has mentioned the

term “cycle or bikeability” in conversation? Who was the conversation with and what was the nature of that conversation?

- c. If you had to describe features or attributes associated with a cycle-or bike-able neighbourhood to a colleague or client, what would you say?
- d. If you had to describe features or attributes associated with a low cycle-or bike-able neighbourhood to a colleague or client, what would you say?
- e. What might be some advantages and or disadvantages of living in a cycle-or bike-able community?

**4. Describe what you think the term “vibrancy” means in relation to neighbourhood or community design?**

- a. Where have you seen or read “vibrancy” in housing related promotional or marketing material (e.g., real estate magazines, housing sections of newspapers, television, signs and billboards)?
- b. Tell me about a time when you, or someone else in a professional setting, has mentioned the term “vibrancy” in conversation? Who was the conversation with and what was the nature of that conversation?
- c. If you had to describe features or attributes associated with a vibrant neighbourhood to a colleague or client, what would you say?
- d. If you had to describe features or attributes associated with a non-vibrant neighbourhood to a colleague or client, what would you say?
- e. What might be some advantages or disadvantages of living in a vibrant neighbourhood?

**5. Describe what you think the term “livable or livability” means in relation to neighbourhood design?**

- a. Where have you seen or read “livable or livability” in housing related promotional or marketing material (e.g., real estate magazines, housing sections of newspapers, television, signs and billboards)?
- b. Tell me about a time when you, or someone else in a professional setting, has mentioned the term “livable or livability” in conversation? Who was the conversation with and what was the nature of that conversation?
- c. If you had to describe features or attributes associated with a liveable neighbourhood to a colleague or client, what would you say?
- d. What might be some advantages or disadvantages of living in a liveable neighbourhood?
